# Supplementary material
Source: PubMed Central journal article supplement (PMC2359806)
Supplement: pnas_0712181105_4.pdf [file pnas_0712181105_4.pdf]

| Barcode Site                                           | 59 | 82 | 100 | 200 | 208 | 212 | 271 | 292 | 313 | 364 | 397 | 442 | 451 | 477 | 478 | 493 | 547 | 562 | 625 | 637 | 646 |
|--------------------------------------------------------|----|----|-----|-----|-----|-----|-----|-----|-----|-----|-----|-----|-----|-----|-----|-----|-----|-----|-----|-----|-----|
| <i>Perichares adela</i> REPRESENTATIVE 04-SRNP-40622   | T  | T  | T   | G   | A   | C   | T   | C   | T   | T   | C   | C   | A   | G   | C   | G   | T   | G   | T   | A   | C   |
| <i>Perichares prestoeaphaga</i> HOLOTYPE 01-SRNP-22227 | T  | T  | T   | G   | A   | C   | C   | C   | T   | C   | C   | C   | A   | G   | C   | G   | T   | A   | A   | N   | N   |
| <i>Perichares geonomaphaga</i> HOLOTYPE 04-SRNP-2706   | T  | T  | T   | G   | A   | C   | T   | C   | T   | C   | T   | C   | A   | A   | C   | A   | T   | A   | A   | A   | C   |
| <i>Perichares poaceaphaga</i> HOLOTYPE 06-SRNP-1189    | C  | C  | A   | A   | T   | T   | C   | T   | C   | T   | C   | T   | T   | A   | T   | A   | C   | G   | A   | G   | T   |
